# Supplementary material
Source: Research Square preprint supplement (doi:10.21203/rs.3.rs-9988030/v1)
Supplement: Supplementary file 1 [file d1e1f340a9ddd528315f5a5f.docx]

## **Appendix I: Detailed translation and validation procedures**

***Translation (Phase 1)***

The translation process followed the guidelines of Beaton *et al.* (2000) and Guillemin *et al. (*1995). Two independent bilingual translators (CKC, a speech and language pathologist specializing in Philippine studies (anthropology), and GFR, a public health educator with expertise in occupational health and human chronobiology. Those with Filipino as their first language completed forward translations from English to Filipino. Both translators were familiar with the target population but were not informed of the specific study hypotheses. The two forward translations were compared and reconciled through discussion to produce a single preliminary Filipino version.

Two different independent bilingual translators (AOB, an educator and a gerontology nursing expert, and JDA, a public health education expert), both English speakers and fluent in Filipino, completed backward translations from Filipino to English without access to the original English questionnaire. The research team compared the backward translations with the original English version to identify discrepancies in meaning. A total of twelve semantic discrepancies were identified and discussed.

The forward translations, backward translations, and original English version were then reviewed by a seven-member expert committee. The committee assessed semantic equivalence (the literal meaning of words), idiomatic equivalence (colloquial expressions), experiential equivalence (the relevance of items to daily experiences), and conceptual equivalence (construct validity within the Filipino cultural context) (Guillemin *et al.* 1995; Beaton *et al.* 2000). Based on committee deliberations, the format of majority of the items was changed from declarative statement to an interrogative (question-based) format, as committee members judged questions to be more culturally appropriate and easier for older Filipino adults to interpret. Key terminology decisions included: *"interbensyon"* (intervention) was replaced with *"ehersisyo o programa"* (exercise or program); *"moral/etikal"* (moral/ethical) was contextualized with concrete examples; *"makatarungan"* (fair/just, formal register) was replaced with "patas" (fair/even-handed, conversational register); *"tiwala sa sarili"* (self-trust) was replaced with *"kumpiyansa sa sarili"* (confidence in oneself); and opportunity cost items were reframed with neutral language to avoid defensive responses.

***Content Validity Assessment***

Each of the seven expert committee members independently rated each item for relevance to its intended TFA construct using a 4-point scale (1 = not relevant, 2 = somewhat relevant, 3 = quite relevant, 4 = highly relevant) (Oliveira *et al.* 2026). The item-level content validity index (I-CVI) was computed as the proportion of experts who rated the item as 3 or 4. Scale-level content validity index based on the average method (S-CVI/Ave) was computed as the mean of all I-CVIs. Scale-level content validity index based on universal agreement (S-CVI/UA) was computed as the proportion of items rated 3 or 4 by all experts. Thresholds of I-CVI ≥0.78, S-CVI/Ave ≥0.90, and S-CVI/UA ≥0.80 were applied (Polit and Beck 2006; Shi *et al.* 2012).

***Cognitive Interviews (Phase 2)***

Cognitive interviews were conducted with twelve older adults using a think-aloud technique (Künzli 2009). Participants were asked to read each item aloud, verbalize their thought processes as they formulated a response, and provide their rating. After completing all items, the interviewer (ZGR) probed for any items that were confusing, difficult to answer, or contained unfamiliar words. Interview notes were coded by two independent researchers (APG and ZGR) using the following categories: (1) no problem identified; (2) participant reread or stumbled over the item; (3) difficulty generating an answer; (4) questioned the content or wording of the item; (5) answered a different question or gave reasoning inconsistent with their answer. Discrepancies were resolved through discussion. Consistent with the recommended review and finalization procedures for cognitive debriefing, items repeatedly identified as problematic were revised by consensus of the committee. Because no universally accepted cutoff exists for revising items based on cognitive debriefing feedback, we prespecified a pragmatic rule that items flagged by at least 3 of 12 participants would undergo committee review and revision (Wild *et al.* 2005). The most frequently flagged terms were *"interbensyon"* (n=10 participants), *"moral/etikal*" (n=7), *"tiwala sa sarili"* (n=6), and *"makatarungan"* (n=5). Necessary revisions were made as described above.

***Pilot Testing and Instrumentation (Phase 3)***

The final Filipino TFA questionnaire consisted of ten items, with one item per TFA construct except for Affective Attitude and Ethicality consisting of two items (Q1 & Q2=Affective Attitude, Q3=Burden, Q4 & Q5=Ethicality, Q6=Perceived Effectiveness [overall benefit], Q7=Intervention Coherence [understanding], Q8=Self-Efficacy, Q9=Opportunity Costs) plus one item assessing overall acceptability (Q10=General Acceptability). The items were rated on a 5-point Likert scale (1= Strongly Disagree, 2 = Disagree, 3 = Neutral, 4 = Agree, 5 = Strongly Agree). Higher scores indicate greater acceptability. Items were adapted to assess an example intervention, the acceptability of Qigong meditation, a gentle mind-body exercise program described to participants as involving slow movements, breathing exercises, and meditation (Stahl *et al.* 2020; Yeh *et al.* 2025).

Questionnaires were administered face-to-face by two research assistants trained by the investigators. For participants with functional limitations (e.g., vision impairment, limited literacy), the trained research assistants read items aloud and recorded responses. Sociodemographic data (age, sex, marital status, education, income source, living arrangement) and functional status (mobility, vision, hearing limitations) were collected via structured interview. The questionnaires were administered through a traditional paper-based method. The responses were then encoded in an online form via Qualtrics. The investigators reviewed, processed, and cleaned the encoded responses. The data was endorsed to the statistician for analysis.

## **Appendix II: Detailed statistical analysis**

Descriptive statistics (means, standard deviations, frequencies, percentages) were computed for sociodemographic characteristics and item responses. Floor and ceiling effects were assessed by computing the percentage of participants responding at the lowest or highest possible score, with >15% considered substantial (Gulledge *et al.* 2019). All analyses were conducted using STATA version 19 (StataCorp, College Station, TX, USA). Statistical significance was set at *p*<0.05.

***Content validity:*** Each of the seven expert committee members independently rated each item for relevance to its intended TFA construct using a 4-point scale (1 = not relevant, 2 = somewhat relevant, 3 = quite relevant, 4 = highly relevant) (Oliveira *et al.* 2026). The item-level content validity index (I-CVI) was computed as the proportion of experts who rated the item as 3 or 4. Scale-level content validity index based on the average method (S-CVI/Ave) was computed as the mean of all I-CVIs. Scale-level content validity index based on universal agreement (S-CVI/UA) was computed as the proportion of items rated 3 or 4 by all experts. Thresholds of I-CVI ≥0.78, S-CVI/Ave ≥0.90, and S-CVI/UA ≥0.80 were applied (Polit and Beck 2006; Shi *et al.* 2012). Details on validation procedures can also be found in Appendix I.

***Construct validity:*** Exploratory factor analysis (EFA) with principal components extraction and varimax (orthogonal) rotation was conducted. Sampling adequacy was assessed using the Kaiser-Meyer-Olkin (KMO) measure (≥0.60 acceptable, ≥0.80 good) (Shrestha 2021; Zhang *et al.* 2024) and Bartlett's test of sphericity (p<0.05 indicating factorable correlation matrix) (Tobias and Carlson 1969). Factors with eigenvalues >1.0 were retained, and scree plot inspection was used to confirm factor retention decisions. Items with factor loadings ≥0.40 and communalities (h²) ≥0.30 were considered adequately represented (Patil *et al.* 2008; Mooi *et al.* 2017).

***Internal consistency reliability:*** Cronbach's alpha was computed for the total scale, with α ≥0.70 considered acceptable (Adamson and Prion 2013). Item-total correlations (corrected for overlap) were computed, with r ≥0.30 indicating adequate item contribution (Zijlmans *et al.* 2019). Cronbach's alpha after deleting an item was examined to identify items that reduced scale coherence. Inter-item correlations were assessed using Spearman's rho, with values between 0.15 and 0.50 considered optimal (values <0.15 suggest items are unrelated; values >0.50–0.70 suggest redundancy) (Izah *et al.* 2023).

***Test-retest reliability:*** Intraclass correlation coefficient (ICC) using a two-way mixed-effects model with absolute agreement was computed for the total scale score and individual items (McGraw and Wong 1996). ICC values were interpreted as: <0.50 = poor, 0.50–0.74 = moderate, 0.75–0.89 = good, ≥0.90 = excellent (Koo and Li 2016). Koo and Li (2016) recommend a minimum sample size of 30 for ICC estimation; the present pilot used n=10, and results are therefore considered preliminary.

## **Appendix III. Filipino TFA Questionnaire (Bilingual Version)**

| **TFA Construct** | **Questionnaire item** |
| --- | --- |
| **Affective Attitude/Pakiramdam tungkol sa interbensyon**  How an individual feels about the intervention/ Kung ano ang pakiramdam ng isang tao sa interbensyon | **Affective attitude / Pakiramdam tungkol sa interbensyon**  Q1. Did you like or dislike [intervention]? Nagustuhan mo ba ang [interbensyon]?  1 Strongly dislike / Lubos na hindi nagustuhan  2 Dislike / Hindi nagustuhan  3 No opinion / Walang opinyon  4 Like / Nagustuhan  5 Strongly like / Lubos na nagustuhan  Q2. How comfortable did you feel [behavior e.g. engage with] [intervention]? / Gaano ka kakumportable sa [interbensyon]?  1 Very uncomfortable / Lubos na hindi kumportable  2 Uncomfortable / Hindi kumportable  3 No opinion / Walang opinyon  4 Comfortable / Kumportable  5 Very comfortable / Lubos na kumportable |
| **Burden / Hirap o pagsisikap na**  **kinailangan para**  **makilahok sa**  **interbensyon**  The amount of effort required to participate in the intervention. / Ang pagsisikap na  kinailangan upang  makibahagi sa  interbensyon. | Q3. How much effort did it take [behavior e.g. engage with] [intervention]? / Gaano kalaki ang pagsisikap o effort na kailangan mo para makalahok sa [interbensyon]?  1 No effort at all / Walang anumang pagsisikap  2 A little effort / Kaunting pagsisikap ang kinakailangan  3 No opinion / Walang opinyon  4 A lot of effort / Kinakailangan ng pagsisikap  5 Huge effort / Lubos na pagsisikap ang kinakailangan |
| **Ethicality / Pagkakatugma sa**  **sariling mga paniniwala**  **at mga pinapahalagahan** The extent to which the intervention has good fit with an individual’s value system. / Kung gaano kaangkop  ang interbensyon sa  sariling paniniwala at mga  pinapahalagahan. | Q4. There are moral or ethical consequences [behavior e.g. engage with] [intervention] / May mga usaping moral o etikal ang paglahok sa [interbensyon].  1 Strongly disagree / Lubos na hindi sumasang-ayon  2 Disagree / Hindi sumasang-ayon  3 No opinion / Walang opinyon  4 Agree / Sumasang-ayon  5 Strongly agree / Lubos na sumasang-ayon  Q5. How fair is [intervention] for [people/participants/recipients] with [condition]? / Gaano kapatas ang [interbensyon] para sa mga nais na kalahok?  1 Very unfair / Lubos na hindi patas  2 Unfair / Hindi patas  3 No opinion / Walang opinyon  4 Fair / Patas  5 Very Fair / Lubos na patas |
| **Perceived effectiveness** / Inaasahang bisa ng  interbensyon The extent to which the intervention have achieved its intended purpose /  Kung gaano kahusay na naabot ng interbensyon  ang layunin nito, ayon sa pananaw ng kalahok. | Q6. The [intervention] has improved [behavior/condition/clinical outcome] / Nakatulong ang [interbensyon] sa pagpapabuti ng  [paguugali/kondisyon/kinalabasan/kalusugan.  1 Strongly disagree / Lubos na hindi sumasang-ayon  2 Disagree / Hindi sumasang-ayon  3 No opinion / Walang opinyon  4 Agree / Sumasang-ayon  5 Strongly agree / Lubos na sumasang-ayon |
| **Intervention Coherence / Pagkakaunawa sa**  **interbensyon** The extent to which the participant understands the intervention and how it works / Kung gaano nauunawaan  ng kalahok ang layunin,  proseso, at paraan ng  interbensyon. | Q7. It is clear to me how [intervention] will help [manage/improve] my [behavior/condition/clinical outcome] / Malinaw sa akin kung paano makakatulong ang [interbensyon] sa pagsasaayos  o pagpapabuti ng aking [kondisyon o pag-uugali].  1 Strongly disagree / Lubos na hindi sumasang-ayon  2 Disagree / Hindi sumasang-ayon  3 No opinion / Walang opinyon  4 Agree / Sumasang-ayon  5 Strongly agree / Lubos na sumasang-ayon  **Please tell us more about your views /Maari pong sabihin sa amin ang iba niyo pang pananaw.* |
| **Self-efficacy / Kumpiyansa sa sariling**  **kakayahang makilahok**  **sa interbensyon** The participant's confidence that they can perform the behaviour(s) required to participate in the intervention / Ang kumpiyansa ng  kalahok na kaya niyang  gawin ang mga  kinakailangan para  makilahok sa  interbensyon. | Q8. How confident did you feel about [behavior e.g. engage with] [intervention]? / Gaano ka katiwala sa iyong sarili na kaya mong lumahok sa [interbensyon]?  1 Very unconfident / Lubos na hindi tiwala sa sarili  2 Unconfident / Hindi tiwala sa sarili  3 No opinion / Walang opinyon  4 Confident / May tiwala sa sarili  5 Very confident / Lubos na tiwala sa sarili |
| **Opportunity costs / Mga isinakripisyong**  **gawain o tungkulin para**  **makilahok sa**  **interbensyon** The benefits, profits or values that were given up to engage in the intervention / Mga benepisyo, kita, o  bagay na mahalaga na  kinailangang isantabi  upang makilahok sa  interbensyon. | Q9. [Behavior e.g. engaging in] [intervention] interfered with my other priorities / Ang pakikilahok sa [interbensyon] ay nakaapekto sa iba kong mga prayoridad na gawain.  1 Strongly disagree / Lubos na hindi sumasang-ayon  2 Disagree / Hindi sumasang-ayon  3 No opinion / Walang opinyon  4 Agree / Sumasang-ayon  5 Strongly agree / Lubos na sumasang-ayon |
| **General Acceptability / Pangkalahatang**  **pagtanggap sa**  **interbensyon**  Kung gaano katanggap-  tanggap ang interbensyon sa kabuuan, ayon sa  pakiramdam at karanasan  ng kalahok. | Q.10 How acceptable was the [intervention] to you? / Gaano katanggap-tanggap sa iyo ang [interbensyon]?  1 Completely unacceptable / Lubos na hindi katanggap-tanggap  2 Unacceptable / Hindi katanggap-tanggap  3 No opinion / Walang opinyon  4 Acceptable / Katanggap-tanggap  5 Completely acceptable / Lubos na katanggap-tanggap |

**Appendix IV: Supplementary Tables**

**IV.a. Sociodemographic and Functional Characteristics of Older Adult Participants in the Pilot Study (n=80).**

| **Characteristic** | **n (%) or Mean (SD)** |
| --- | --- |
| **Age, in years** | |
| Mean (SD) | 69.3 (6.2) |
| 60–69 | 46 (57.5%) |
| 70–79 | 26 (32.5%) |
| ≥80 | 8 (10.0%) |
| **Sex** | |
| Female | 60 (75.0%) |
| Male | 20 (25.0%) |
| **Marital Status** | |
| Married | 38 (47.5%) |
| Widowed | 28 (35.0%) |
| Single/Separated | 14 (17.5%) |
| **Educational Attainment** | |
| No formal schooling | 4 (5.0%) |
| Elementary (1–6 years) | 18 (22.5%) |
| High school (7–12 years) | 37 (46.3%) |
| College or higher | 21 (26.3%) |
| **Primary Income Source** | |
| Pension (government/private) | 35 (43.8%) |
| Business/self-employment | 22 (27.5%) |
| Family support | 23 (28.8%) |
| **Living Arrangement** | |
| With spouse/partner | 36 (45.0%) |
| With adult children | 32 (40.0%) |
| Alone | 8 (10.0%) |
| With other relatives | 4 (5.0%) |
| **Functional Limitations*** | |
| Mobility difficulties | 29 (36.3%) |
| Vision problems | 22 (27.5%) |
| Hearing problems | 22 (27.5%) |
| No reported limitations | 32 (40.0%) |

**Note. Percentages may not sum to 100% due to rounding. Some participants reported multiple functional limitations.*

**IV.b. Internal Consistency Reliability Statistics and Item-Level Descriptive Data (n=80)**

| **Item** | **TFA Construct** | **Mean (SD)** | **Floor Effect (%)** | **Ceiling Effect (%)** | **Item-Total Correlation (r)** | **α if Item Deleted** |
| --- | --- | --- | --- | --- | --- | --- |
| Q1 | Affective Attitude (Liking) | 4.26 (0.47) | 0.0 | 27.5 | 0.26 | 0.73 |
| Q2 | Affective Attitude (Comfort) | 4.19 (0.53) | 0.0 | 23.8 | **0.46** | 0.70 |
| Q3 | Burden | 4.19 (0.83) | 0.0 | 36.2 | 0.36 | 0.72 |
| Q4 | Ethicality | 4.02 (0.86) | 1.2 | 28.8 | 0.48 | 0.70 |
| Q5 | Ethicality (Fairness) | 4.20 (0.62) | 0.0 | 31.2 | 0.51 | 0.69 |
| Q6 | Perceived Effectiveness | 4.35 (0.64) | 1.2 | 40.0 | **0.53** | 0.69 |
| Q7 | Intervention Coherence | 4.38 (0.72) | 1.2 | 47.5 | 0.33 | 0.72 |
| Q8 | Self-Efficacy | 4.35 (0.53) | 0.0 | 37.5 | 0.48 | 0.70 |
| Q9 | Opportunity Costs | 3.94 (0.97) | 1.2 | 28.8 | 0.16 | 0.77 |
| Q10 | General Acceptability | 4.30 (0.54) | 0.0 | 33.8 | 0.63 | 0.68 |
| **Total Scale** |  | **42.18 (3.73)** | — | — | — | **α = 0.73** |

*Note. Item-total correlation = corrected item-total correlation (correlation between item and sum of remaining items). Floor effect = % responding "1 = Strongly Disagree"; Ceiling effect = % responding "5 = Strongly Agree." Acceptable thresholds: item-total correlation ≥ 0.30; Cronbach's α ≥ 0.70. Scale range: 10–50. Bold values denote strongest item-total correlation*

**IV.c. Test-Retest Reliability (n=10)**

| **Item** | **TFA Construct** | **ICC** | **95% CI** | **Interpretation** |
| --- | --- | --- | --- | --- |
| Q1 | Liking | 0.33 | (-0.16, 0.75) | Poor |
| Q2 | Comfort | 0.37 | (-0.33, 0.80) | Poor |
| Q3 | Burden | -0.34 | (-0.79, 0.34) | Poor |
| Q4 | Ethicality | 0.38 | (-0.33, 0.80) | Poor |
| Q5 | Fairness | 0.16 | (-0.27, 0.64) | Poor |
| Q6 | Perceived Effectiveness | 0.00 | (-0.69, 0.62) | Poor |
| Q7 | Coherence | 0.16 | (-0.55, 0.70) | Poor |
| Q8 | Self-Efficacy | -0.62 | (-1.03, 0.12) | Poor |
| Q9 | Opportunity Costs | 0.29 | (-0.35, 0.76) | Poor |
| Q10 | General Acceptability | 0.33 | (-0.16, 0.75) | Poor |
| **Total Scale** | **All Items** | **0.11** | **(-0.26, 0.59)** | **Poor** |

*Note: Poor temporal stability likely due to small sample size (n=10) rather than instrument deficiency. Future validation requires n≥50 for reliable ICC estimation.*
